# Supplementary material for: Plasma Lipid Profiling Contributes to Untangle the Complexity of Moyamoya Arteriopathy
Source: MDPI journal article supplement (doi:10.3390/ijms222413410), 2021-12-14
Supplement: s1 [file s1]

| ID |    | Age | Gender | CVD type   | NIHSS | U-B | Suzuki grading | Vascular risk factors | Pharmacological therapy |
|----|----|-----|--------|------------|-------|-----|----------------|-----------------------|-------------------------|
| MA | 3  | 43  | F      | IS         | 4     | U   | I              | -                     | AG, ASA,ST, AE          |
| MA | 5  | 44  | F      | HS         | 5     | B   | IV             | H                     | AE, AD                  |
| MA | 9  | 54  | M      | TIA        | 0     | B   | IV             | DL                    | AG, ASA,AD              |
| MA | 10 | 59  | M      | IS         | 4     | B   | IV             | HoS                   | AG, ASA                 |
| MA | 11 | 37  | F      | HS         | 0     | U   | IV             | HT                    | AG, ASA                 |
| MA | 14 | 15  | F      | TIA        | 0     | U   | IV             | -                     | AG, ASA                 |
| MA | 15 | 47  | F      | IS         | 8     | B   | IV             | H, PI,                | AG, ASA, ST, AE         |
| MA | 19 | 42  | F      | IS         | 2     | B   | IV             | HT                    | AG, ASA, ST, AE         |
| MA | 20 | 46  | F      | Other      | 0     | U   | III            | -                     | AG, ASA                 |
| MA | 21 | 50  | F      | HS         | 1     | B   | IV             | -                     | AD                      |
| MA | 23 | 71  | F      | IS         | 7     | U   | III            | DL                    | AG, ASA, ST, AE         |
| MA | 24 | 51  | F      | TIA        | 0     | B   | III            | HoS, ET               | AG, ASA, ST, AE         |
| MA | 25 | 54  | F      | Other      | 0     | U   | III            | HoS                   | -                       |
| MA | 30 | 30  | F      | TIA        | -     | U   | III            | -                     | AG, ASA                 |
| MA | 31 | 49  | M      | IS         | 3     | U   | IV             | DM, DL, HoS           | AG, ASA, Other          |
| MA | 33 | 70  | F      | Other      | 0     | U   | -              | H, DL, HoS            | AG, ASA                 |
| MA | 34 | 22  | F      | TIA        | 10    | B   | IV             | H                     | -                       |
| MA | 35 | 30  | M      | Other      | 0     | B   | V              | DL, AA                | -                       |
| MA | 37 | 28  | F      | Other      | 0     | U   | IV             | PI                    | AG                      |
| MA | 38 | 63  | M      | HS         | 0     | B   | IV             | H, DM, DL, IHH, HT    | ST, CCB                 |
| MA | 40 | 47  | F      | TIA        | 3     | B   | IV             | H, HoS, PI            | AG, ASA, Other          |
| MA | 41 | 52  | F      | Other      | 0     | B   | V              | PI                    | -                       |
| MA | 42 | 39  | F      | HS         | 0     | B   | III            | DL, HoS, PI           | ST                      |
| MA | 43 | 45  | F      | IS         | 0     | B   | IV             | PI, HHC               | AG,ASA                  |
| MA | 45 | 60  | F      | IS         | 4     | B   | V              | H, DL                 | AG, ASA ST              |
| MA | 48 | 52  | F      | HS         | 0     | U   | IV             | -                     | -                       |
| MA | 49 | 36  | F      | Other      | -     | U   | VI             | PI, ET, HT            | Other                   |
| MA | 51 | 56  | F      | IS         | 0     | B   | III            | H, DL, HoS, HHC       | AG, ASA, ST             |
| MA | 52 | 37  | F      | IS         | 2     | B   | VI             | H, DL, ET. HT         | AG, ASA, ST, Other      |
| MA | 53 | 45  | M      | TIA        | -     | B   | VI             | DL, HoS, AA, HT       | AG, ASA,ST              |
| MA | 54 | 53  | M      | TIA        | 0     | U   | IV             | H, DL                 | AG, ASA, ST, Other      |
| MA | 56 | 53  | F      | TIA        | -     | B   | -              | -                     | AG, ASA, Other          |
| MA | 58 | 30  | F      | IS         | 5     | B   | III            | HoS                   | AG, ASA                 |
| MA | 59 | 56  | F      | TIA        | 0     | B   | IV-V           | H, DL                 | AG, ASA, ST, AE         |
| MA | 61 | 38  | F      | TIA, Other | 0-2   | B   | IV             | HoS,PI                | AG, ASA, Other          |
| MA | 63 | 53  | F      | HS         | 0     | U   | -              | HT                    | ST, AE                  |
| MA | 66 | 43  | F      | IS         | 2     | U   | -              | HoS                   | AG, ST                  |
| MA | 68 | 40  | F      | HS         | -     | U   | -              | HoS, PI               | -                       |
| MA | 70 | 27  | F      | Other      | -     | B   | -              | H, PI                 | AG, ASA, AE             |
| MA | 71 | 47  | F      | IS         | 4     | B   | -              | H, HoS, PI            | AG, ASA,Other           |

**Supplementary Table S1:** Demographic, clinical and neuro-radiological features of 40 MA patients whose plasma samples were included in biological analyses (AA, alcohol abuse; AD, antidepressant; AE, antiepileptic; AG, antiaggregants; AH, antihypertensive; AHHC, anti-hyperhomocysteinemia; ASA, acetylsalicylic acid; B, bilateral; CCB, calcium channel blockers; CVD, cerebrovascular disease; DL, dyslipidemia; DM, diabetes mellitus; ET, estroprogestinic therapy; f, female; H, hypertension; HHC, hyperhomocysteinemia; HoS, history of smoking; HS, hemorrhagic stroke; HT, head trauma; IHH, ischemic heart disease; IS, ischemic stroke; m, male; MA, moyamoya arteriopathy; NIHSS, National Institute of Health scale; PI, physical inactivity; PSY, psychiatric disorder; ST, statins; TIA, transient ischemic attack; U, unilateral).

| ID |    | Age | Gender | CVD type   | NIHSS | U-B | Suzuki grading | Vascular risk factors | Pharmacological therapy |
|----|----|-----|--------|------------|-------|-----|----------------|-----------------------|-------------------------|
| MA | 5  | 44  | F      | HS         | 5     | B   | IV             | H                     | AE, AD                  |
| MA | 15 | 47  | F      | IS         | 8     | B   | IV             | H, PI,                | AG, ASA, ST, AE         |
| MA | 19 | 42  | F      | IS         | 2     | B   | IV             | HT                    | AG, ASA, ST, AE         |
| MA | 21 | 50  | F      | HS         | 1     | B   | IV             | -                     | AD                      |
| MA | 24 | 51  | F      | TIA        | 0     | B   | III            | HoS, ET               | AG, ASA, ST, AE         |
| MA | 34 | 22  | F      | TIA        | 10    | B   | IV             | H                     | -                       |
| MA | 40 | 47  | F      | TIA        | 3     | B   | IV             | H, HoS, PI            | AG, ASA, Other          |
| MA | 41 | 52  | F      | Other      | 0     | B   | V              | PI                    | -                       |
| MA | 42 | 39  | F      | HS         | 0     | B   | III            | DL, HoS, PI           | ST                      |
| MA | 43 | 45  | F      | IS         | 0     | B   | IV             | PI, HHC               | AG, ASA                 |
| MA | 45 | 60  | F      | IS         | 4     | B   | V              | H, DL                 | AG, ASA ST              |
| MA | 51 | 56  | F      | IS         | 0     | B   | III            | H, DL, HoS, HHC       | AG, ASA, ST             |
| MA | 52 | 37  | F      | IS         | 2     | B   | VI             | H, DL, ET, HT         | AG, ASA, ST, Other      |
| MA | 59 | 56  | F      | TIA        | 0     | B   | IV-V           | H, DL                 | AG, ASA, ST, AE         |
| MA | 61 | 38  | F      | TIA, Other | 0-2   | B   | IV             | HoS, PI               | AG, ASA, Other          |

**Supplementary Table S2:** Demographic, clinical and neuroradiological features of 15 MA patients (AA, alcohol abuse; AD, antidepressant; AE, antiepileptic; AG, antiaggregants; AH, antihypertensive; AHHC, anti-hyperhomocysteinemia; ASA, acetylsalicylic acid; B, bilateral; CVD, cerebrovascular disease; DL, dyslipidemia; DM, diabetes mellitus; ET, estroprogestinic therapy; f, female; H, hypertension; HHC, hyperhomocysteinemia; HoS, history of smoking; HS, hemorrhagic stroke; HT, head trauma; IHH, ischemic heart disease; IS, ischemic stroke; m, male; MA, moyamoya arteriopathy; NIHSS, National Institute of Health scale; PI, physical inactivity; PSY, psychiatric disorder; ST, statins; TIA, transient ischemic attack; U, unilateral).

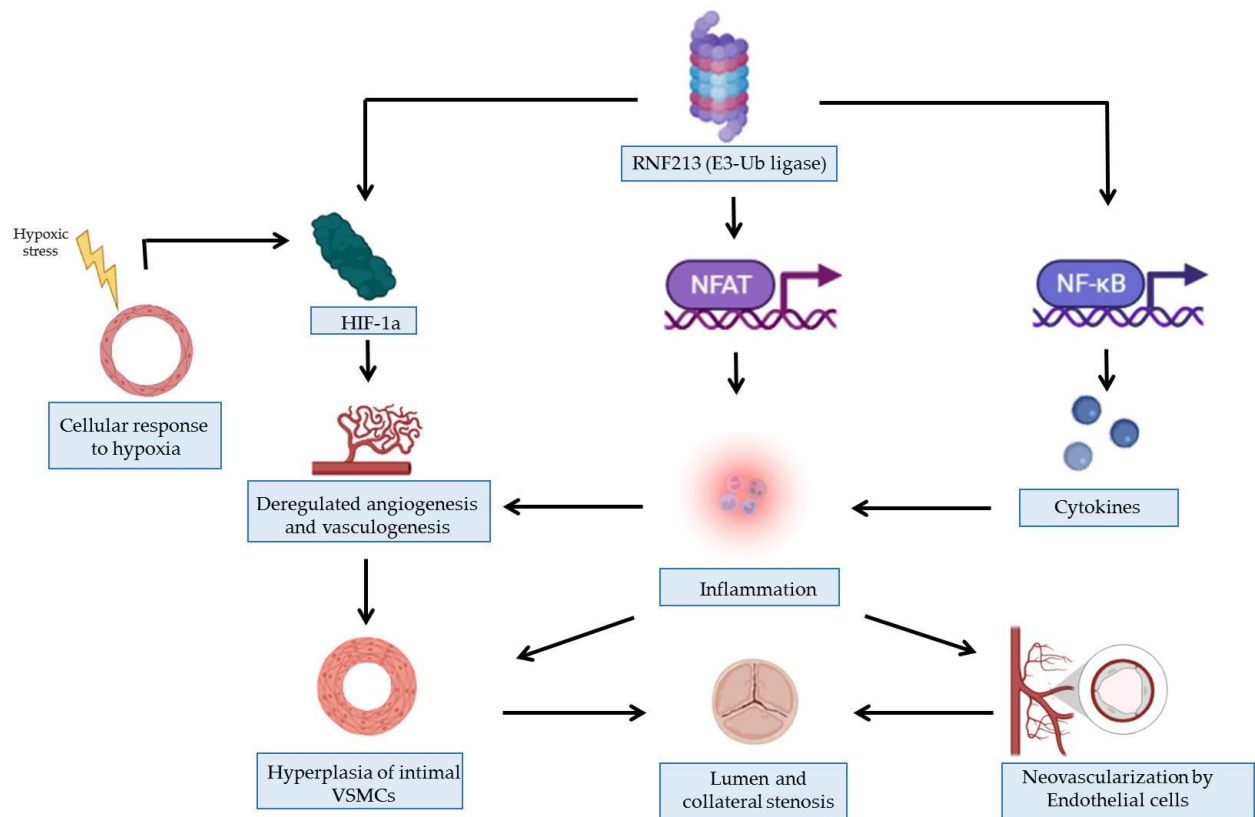

**Supplementary Figure S1.** Implications of RNF213 in vasculogenic/angiogenic/inflammatory pathways.

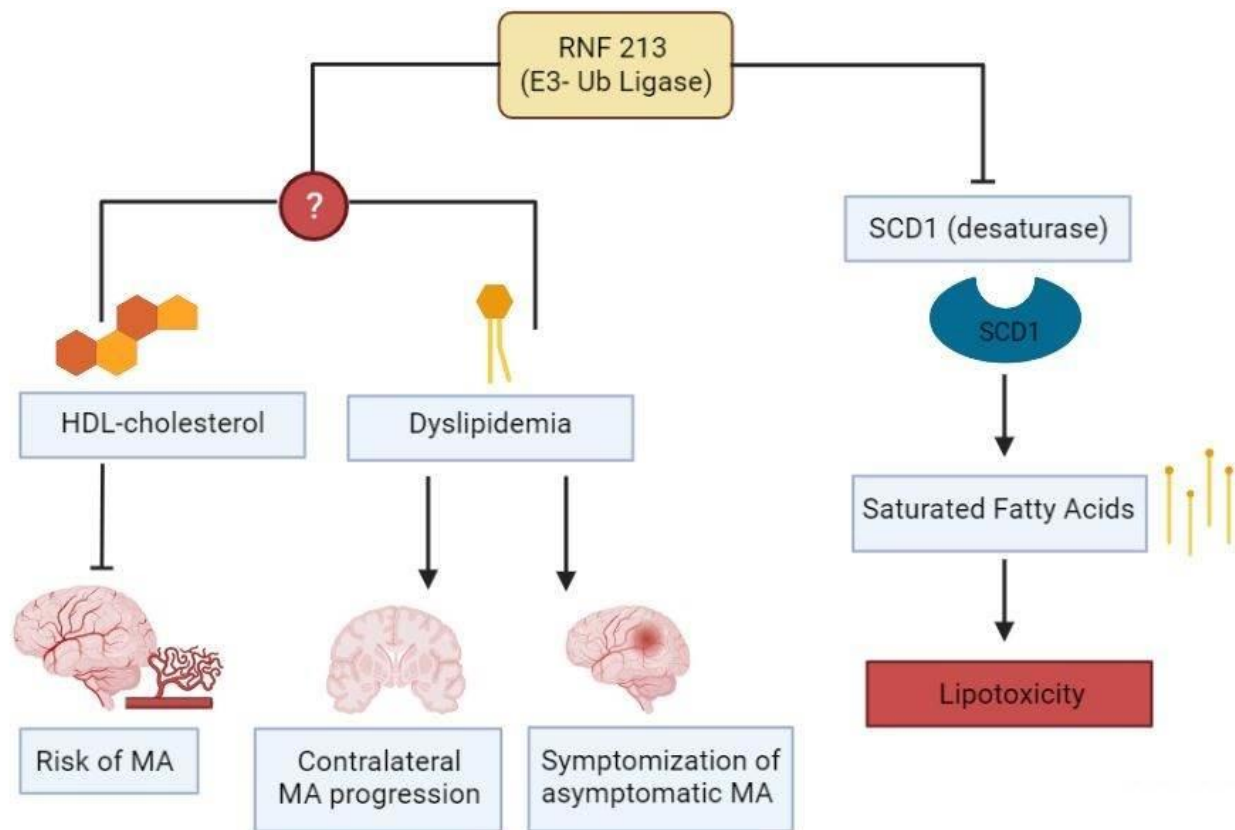

**Supplementary Figure S2.** Putative effects of RNF213 in lipid metabolism.
